# Supplementary material
Source: ML conference proceedings conference paper supplement (https://proceedings.neurips.cc/paper_files/paper/2024/hash/62c6d7893b13a13c659cb815852dd00d-Abstract.html)
Supplement: Supplementary file 1 [file 62c6d7893b13a13c659cb815852dd00d-Supplemental-Datasets_and_Benchmarks_Track.pdf]

---

# FVEL: Interactive Formal Verification Environment with Large Language Models via Theorem Proving

---

Xiaohan Lin<sup>1\*</sup> Qingxing Cao<sup>1\*</sup> Yinya Huang<sup>2\*</sup> Haiming Wang<sup>3\*</sup> Jianqiao Lu<sup>4</sup>  
Zhengying Liu<sup>5</sup> Linqi Song<sup>2</sup> Xiaodan Liang<sup>1,6,7†</sup>

<sup>1</sup>Shenzhen Campus of Sun Yat-sen University <sup>2</sup>City Univeristy of Hong Kong

<sup>3</sup>Sun Yat-sen University <sup>4</sup>The University of Hong Kong

<sup>5</sup>Huawei Noah's Ark Lab <sup>6</sup>MBZUAI <sup>7</sup>DarkMatter AI Research

|    |                                                          |           |
|----|----------------------------------------------------------|-----------|
| 1  | <b>Appendix</b>                                          |           |
| 2  | <b>A Limitations</b>                                     | <b>2</b>  |
| 3  | <b>B Societal Impacts</b>                                | <b>2</b>  |
| 4  | <b>C FVELER Benchmark</b>                                | <b>2</b>  |
| 5  | C.1 Dataset Format . . . . .                             | 2         |
| 6  | C.1.1 sel4_extraction/ . . . . .                         | 2         |
| 7  | C.1.2 dataset_lemma_split.json . . . . .                 | 3         |
| 8  | C.1.3 sel4_thy_info.json . . . . .                       | 3         |
| 9  | C.1.4 sel4_session_info.json . . . . .                   | 4         |
| 10 | C.2 Datasheet . . . . .                                  | 5         |
| 11 | C.3 Data Hosting, Licensing, and Maintenance . . . . .   | 7         |
| 12 | <b>D Experiments on FVELER Test Set</b>                  | <b>7</b>  |
| 13 | D.1 Implementation Details . . . . .                     | 7         |
| 14 | D.2 Results . . . . .                                    | 9         |
| 15 | D.3 Case Study . . . . .                                 | 10        |
| 16 | <b>E Implementations Details on Code2Inv and SV-COMP</b> | <b>10</b> |
| 17 | E.1 Evaluation Datasets . . . . .                        | 10        |
| 18 | E.2 Pre-processing . . . . .                             | 11        |
| 19 | E.3 Fine-tuning and Inference . . . . .                  | 11        |
| 20 | E.4 A Case of Python to C Dataset. . . . .               | 11        |

---

\* Equal contribution.

† Corresponding author.

## 21 A Limitations

22 In this work, we follow previous works [4, 2, 8] to test FVEL on C code verification. We remain the  
23 extension of FVEL and the corresponding FVELER to support more program languages as a near  
24 future work. Additionally, semantic alignment between lemma statements and program specifications  
25 is an unexplored area of research.

## 26 B Societal Impacts

27 The research presented in this paper has the potential to advance the field of formal verification,  
28 automated theorem proving, AI for Math, and software engineering. The advancement can enhance  
29 the capabilities of large language models in formal verification, contributing to more reliable software  
30 development. By directly releasing the code and data, we aim to ensure the responsible use of our  
31 work, fostering further innovation and maintaining high standards of data privacy and intellectual  
32 property compliance. The proposed FVEL and FVELER benchmark the interactive formal verifica-  
33 tion performance in the machine learning field. Therefore we claim that there are no negative social  
34 impacts in this paper.

## 35 C FVELER Benchmark

### 36 C.1 Dataset Format

37 We first list the folder and files under the FVELER directory. We then demonstrate the detailed  
38 formats of the folder/files.

- 39 • `sel4_extraction/` is a folder that has the same structure as the sel4 verification project  
40 (l4v). Each file is the extracted step-wise proof state of the corresponding l4v theory files.  
41 For example, “`sel4_extraction/proof/invariant-abstract/AInvs.json`” is the  
42 proof state of the file `l4v/proof/invariant-abstract/AInvs.thy`.
- 43 • `dataset_lemma_split.json` contains all lemmas proof steps and states, and splits them  
44 into the train, val, test, and test-hard set.
- 45 • `sel4_thy_info.json` contains information of all theory files, including their names,  
46 dependency relations, and lemmas.
- 47 • `sel4_session_info.json` contains all session information, including dependent sessions,  
48 theories, and directories.

#### 49 C.1.1 `sel4_extraction/`

50 The `sel4_extraction/` folder contains parsed l4v theory files. Each theory file in this folder is a  
51 JSON file, storing a list of whole proof steps, and each step is stored as a dictionary. The file structure  
52 and a sample proof step are demonstrated as follows:

```
53 sel4_extraction/proof/invariant-abstract/AInvs.json:  
54 [  
55   ... ,  
56   {  
57     "index": 2,  
58     "step": "lemma st_tcb_at_nostate_upd: ...",  
59     "raw_output": "proof (prove)\ngoal (1 subgoal)...",  
60     "step_time": 0.11420297622680664  
61   },  
62   ...  
63 ]
```

66 Each proof step dictionary has the following fields:

- 67 • “index”: The index of this step.

- 68 • “step”: The proof step in Isabelle.
- 69 • “raw\_output”: The returned proof state in Isabelle.
- 70 • “step\_time”: The processing time of this step.

### 71 C.1.2 dataset\_lemma\_split.json

72 The dataset\_lemma\_split.json file stores the train/val/test/test-hard splits. Each split is a list of  
 73 lemmas, and each is stored as a dictionary. The file structure and a sample lemma are demonstrated  
 74 as follows:

```

75 {
76   "train": [
77     {
78       "context": "lemma n_less_equal_power_2:\n  \n < 2 ^ n\" by (
79         fact less_exp)",
80       "proof": [
81         "lemma n_less_equal_power_2:\n  \n < 2 ^ n\"",
82         "by (fact less_exp)"
83       ],
84       "proof_state": [
85         "proof (prove)\ngoal (1 subgoal):\n 1. n < 2 ^ n",
86         ""
87       ],
88       "statement": "lemma n_less_equal_power_2:\n  \n < 2 ^ n\"",
89       "theory_name": "More_Arithmetic",
90       "num_steps": 1
91     },
92     ...
93   ],
94   "val": [ ... ],
95   "test": [ ... ],
96   "test-hard": [ ... ]
97 }
98

```

100 Each lemma dictionary has the following fields:

- 101 • “context”: Full lemma context in plain text.
- 102 • “proof”: A list of all proof steps in Isabelle.
- 103 • “proof\_state”: A list of all proof states in Isabelle.
- 104 • “statement”: The lemma statement to be proved.
- 105 • “theory\_name”: The name of the theory where this lemma belongs.
- 106 • “num\_steps”: The number of steps for proving this lemma.

### 107 C.1.3 sel4\_thy\_info.json

108 sel4\_thy\_info.json contains information regarding the theory files, stored as a dictionary where  
 109 a key is a theory file and the value contains the related information. A sample is demonstrated as  
 110 follows:

```

111 {
112   ... ,
113   "/lib/Word_Lib/More_Word.thy": {
114     "name": "More_Word",
115     "dependency": {
116       "HOL-Library.Word": "",
117       "More_Arithmetic": "/lib/Word_Lib",
118       "More_Divides": "/lib/Word_Lib",
119       "More_Bit_Ring": "/lib/Word_Lib"
120     },
121     "depth": 2,
122     "related_c_code": [],
123

```

```

124   "child": [
125     "/lib/Word_Lib/Aligned.thy",
126     "/lib/Word_Lib/Bit_Shifts_Infix_Syntax.thy",
127     ...,
128     "/lib/Word_Lib/Machine_Word_64.thy"
129   ],
130   "path": "/lib/Word_Lib/More_Word.thy",
131   "session": "Word_Lib",
132   "lemmas": [
133     {
134       "context": "lemma sofl_test: ...",
135       "proof": [...],
136       "proof_state": [...],
137       "statement": "...",
138       "theory_name": "More_Word",
139       "num_steps": 25
140     },
141   ],
142   ...
143 ]

```

145 The information dictionary of a theory file (e.g., “/lib/Word\_Lib/More\_Word.thy”) has the  
 146 following fields:

- 147 • “name”: The theory name.
- 148 • “dependency”: A dictionary of dependent theories and their paths. The key is the theory  
 149 name and the value is the path. A theory that belongs to another session has no path. For  
 150 example, “HOL-Library.Word” is imported from session “HOL-Library”, and its path is  
 151 empty.
- 152 • “depth”: The depth of this theory.
- 153 • “related\_c\_code”: The C code files called by this theory or any of its ancestors.
- 154 • “child”: The theory files depending on this theory.
- 155 • “path”: The theory file path relative to the l4v folder.
- 156 • “session”: The session that contains this theory.
- 157 • “lemmas”: The list of all lemmas in this theory files. Each lemma is stored in a dictionary,  
 158 which is the same as in “dataset\_lemma\_split.json”.

#### 159 C.1.4 sel4\_session\_info.json

160 sel4\_session\_info.json contains information regarding each l4v session, stored as a dictionary  
 161 where a key is an l4v session and the value contains the related information. A sample is demonstrated  
 162 as follows:

```

163 {
164   "ASpec": {
165     "dependency": [
166       "Word_Lib",
167       "\"HOL-Library\"",
168       "Lib",
169       "ExecSpec"
170     ],
171   },
172   "name": "ASpec",
173   "theories": [
174     "/spec/abstract/Structures_A.thy",
175     ...,
176     "/spec/abstract/Exceptions_A.thy"
177   ],
178   "ROOT_dir": "/spec",
179   "ROOT_relative_dir": "abstract",
180   "additional_dir": [
181     ".",

```

```

182     "ARM "
183   ],
184   "depth": 6
185 },
186   ...
187 }

```

189 The information dictionary of a session (e.g., “ASpec”) has the following fields:

- 190 • “dependency”: A list of all its dependent sessions’ names.
- 191 • “name”: The session name.
- 192 • “theories”: The list of all theory files included in this session, represented by their keys in  
193 “sel4\_thy\_info.json”.
- 194 • “ROOT\_dir”: The directory of this session’s ROOT file relative to the l4v folder.
- 195 • “ROOT\_relative\_dir”: The main working directory of this session relative to  
196 “ROOT\_dir”.
- 197 • “additional\_dir”: The list of additional directories containing this session’s theory files  
198 relative to “ROOT\_relative\_dir”.
- 199 • “depth”: The depth of this session.

## 200 C.2 Datasheet

201 We present a datasheet [3] for documentation and responsible usage of FVELER benchmark.

### 202 Motivation.

- 203 • *For what purpose was the dataset created?* The FVELER dataset is created to support the  
204 interactive formal verification with large language models. It provides lemmas for formally  
205 proofing the correctness of a microkernel system with step-wise Isabelle language and state.
- 206 • *Who created the dataset (e.g., which team, research group) and on behalf of which entity*  
207 *(e.g., company, institution, organization)?* It was created by the authors of this paper by  
208 extracting and cleansing the data from the sel4 verification project (l4v).
- 209 • *Who funded the creation of the dataset?* See the acknowledgments once it is available.

### 210 Composition.

- 211 • *What do the instances that comprise the dataset represent (e.g., documents, photos, people,*  
212 *countries)?* The FVELER dataset consists of dependent theory sessions, theory files grouped  
213 by sessions, lemmas from theories, and proof states of the lemmas, all written in Isabelle.
- 214 • *How many instances are there in total (of each type, if appropriate)?* The FVELER dataset  
215 has 758 theories, 29,125 lemmas, and 200,646 proof steps.
- 216 • *Does the dataset contain all possible instances or is it a sample (not necessarily random)*  
217 *of instances from a larger set?* The dataset contains all possible theory files, lemma,  
218 and their proof that PISA can extract from the sel4 verification project (l4v) in ARM  
219 architecture(excluding C Parser and autocorres tools) released on March 11, 2024.
- 220 • *What data does each instance consist of?* Each instance consists of the lemma statement,  
221 the proof step, and the corresponding state in Isabelle code.
- 222 • *Is there a label or target associated with each instance?* Yes, each instance has a target, the  
223 next proof step.
- 224 • *Is any information missing from individual instances?* No.
- 225 • *Are relationships between individual instances made explicit (e.g., users’ movie ratings,*  
226 *social network links)?* Yes, each instance is associated with a theory file, which contains  
227 dependent theory files as its premises.

- 228 • *Are there recommended data splits (e.g., training, development/validation, testing)?* Yes.  
229 We recommend four data splits: a training set with 26,081 lemmas, a validation set with  
230 1,115 lemmas, a test set with 1,077 lemmas, and a test-hard set with 852 lemmas.
- 231 • *Are there any errors, sources of noise, or redundancies in the dataset?* The extracted lemma  
232 is formally verified by Isabelle and thus has no error or noise. There might exist some  
233 redundant proof that is very similar to the others.
- 234 • *Is the dataset self-contained, or does it link to or otherwise rely on external resources (e.g.,  
235 websites, tweets, other datasets)?* The dataset is self-contained.
- 236 • *Does the dataset contain data that might be considered confidential (e.g., data that is  
237 protected by legal privilege or by doctor-patient confidentiality, data that includes the  
238 content of individuals’ non-public communications)?* No.
- 239 • *Does the dataset contain data that, if viewed directly, might be offensive, insulting, threaten-  
240 ing, or might otherwise cause anxiety?* No.

#### 241 **Collection Process.**

- 242 • *How was the data associated with each instance acquired?* The original data contains  
243 Isabelle theory files structured with ROOT file. We apply FVEL to extract their proof steps  
244 and states. The details are described in Section 4 of our paper.
- 245 • *What mechanisms or procedures were used to collect the data (e.g., hardware apparatuses  
246 or sensors, manual human curation, software programs, software APIs)?* The original data  
247 is publicly released in <https://github.com/seL4/l4v>.
- 248 • *Who was involved in the data collection process (e.g., students, crowdworkers, contractors)  
249 and how were they compensated (e.g., how much were crowdworkers paid)?* No manual  
250 effort was involved in the data collection process.
- 251 • *Over what timeframe was the data collected?* The dataset was collected on March 11, 2024.

#### 252 **Preprocessing/cleaning/labeling.**

- 253 • *Was any preprocessing/cleaning/labeling of the data done (e.g., discretization or bucketing,  
254 tokenization, part-of-speech tagging, SIFT feature extraction, removal of instances, process-  
255 ing of missing values)?* The original l4v theory file is parsed into step-wise language by  
256 Isabelle. We then interact with Isabelle using these steps to obtain the step-wise states.
- 257 • *Was the “raw” data saved in addition to the preprocessed/cleaned/labeled data (e.g., to  
258 support unanticipated future uses)?* Yes. We store the original seL4 formal verification files  
259 used for extraction and record the links between each lemma and its original files.
- 260 • *Is the software that was used to preprocess/clean/label the data available?* Yes. We release  
261 the codes and environments for extracting seL4 formal proofs.

#### 262 **Uses.**

- 263 • *Has the dataset been used for any tasks already?* We have used the dataset for fine-tuning  
264 Mistral-7B and llama3-8B for the FVEL environment. We also use the dataset to evaluate  
265 the fine-tuned models.
- 266 • *Is there a repository that links to any or all papers or systems that use the dataset?* <https://fveller.github.io/>  
267
- 268 • *What (other) tasks could the dataset be used for?* The dataset can be used for pertaining  
269 LLMs for various downstream tasks, such as ATP, MWP, and code generation.
- 270 • *Is there anything about the composition of the dataset or the way it was collected and  
271 preprocessed/cleaned/labeled that might impact future uses?* The dataset is based on l4v  
272 and is extracted with Isabelle 2023. The lemma proof and proof states might be different  
273 from future versions of l4v or incompatible with future versions of Isabelle.
- 274 • *Are there tasks for which the dataset should not be used?* No.

275 **Distribution.**

- 276 • *Will the dataset be distributed to third parties outside of the entity (e.g., company, institution,*  
277 *organization) on behalf of which the dataset was created? Yes, the dataset is publicly*  
278 *available on the Internet.*
- 279 • *How will the dataset will be distributed (e.g., tarball on website, API, GitHub)?* The dataset  
280 can be downloaded as a tarball.
- 281 • *When will the dataset be distributed?* The dataset has been released and can be downloaded  
282 from <https://huggingface.co/FVELer>.
- 283 • *Will the dataset be distributed under a copyright or other intellectual property (IP) license,*  
284 *and/or under applicable terms of use (ToU)?* The dataset is distributed under CC BY 2.0.  
285 The dataset was extracted from the <https://github.com/seL4/l4v> and is licensed under GPL  
286 version 2.
- 287 • *Have any third parties imposed IP-based or other restrictions on the data associated with*  
288 *the instances?* No.
- 289 • *Do any export controls or other regulatory restrictions apply to the dataset or to individual*  
290 *instances?* No.

291 **Maintenance.**

- 292 • *Who will be supporting/hosting/maintaining the dataset?* The authors of this paper.
- 293 • *How can the owner/curator/manager of the dataset be contacted (e.g., email address)?*  
294 Please contact Qingxing Cao at [caoqx8@sysu.edu.cn](mailto:caoqx8@sysu.edu.cn).
- 295 • *Is there an erratum?* No.
- 296 • *Will the dataset be updated (e.g., to correct labeling errors, add new instances, delete*  
297 *instances)?* Please check <https://https://fveler.github.io/> for any update.
- 298 • *If others want to extend/augment/build on/contribute to the dataset, is there a mechanism for*  
299 *them to do so?* Yes. they can use our released data extraction code for extending instances  
300 from updated seL4 or other related data sources.

301

302 **C.3 Data Hosting, Licensing, and Maintenance**

303 FVELER benchmark is distributed under the CC BY 2.0 license. The data and the corresponding  
304 documentation are hosted on Hugging Face at <https://huggingface.co/FVELer>. The codes  
305 for data extraction and experiments with the corresponding documentation are released at <https://github.com/FVELER/FVEL>. The model checkpoints are hosted on Hugging Face Hub. Our  
306 website of FVEL and FVELER is <https://fveler.github.io/>, which is the entry point for  
307 everything related, including future updates or maintenance.  
308

309 **D Experiments on FVELER Test Set**

310 **D.1 Implementation Details**

311 We use Mistral-7B-Instruct-v0.2<sup>3</sup> [6] and LLama-3-8B-Instruct models<sup>4</sup> to conduct the experiments  
312 on FVELER test sets.

313 **Fine-tuning.** We use the LLaMa-Factory [9] framework to fine-tune two models on a single RTX  
314 3090 GPU. Specifically, we deploy LORA[5] on the q\_proj and v\_proj modules of both models. We  
315 filter out training samples of a length greater than 1024 and feed the remaining samples into the  
316 model with a global batch size of 8. The training samples are transformed into the alpaca format,  
317 demonstrated in Table 1.

<sup>3</sup><https://huggingface.co/mistralai/Mistral-7B-Instruct-v0.2>

<sup>4</sup><https://github.com/meta-llama/llama3>

Table 1: Demonstrations of input-target pairs in alpaca format for fine-tuning FVEL-LLMs.

|                                                                                                                                                                                                                                                                                                                                                                                                                                                                                                                                                                                                                                                                                                                                                                                                                                                                                                                                                                                                                                                                                                                                                                                                                                                                                                                                                                                                                                                                                                                                                                                                                                                                                                                                                                                                                                                                                                                                                                                                                                                                                                                                                                                                                                                                                                                                                                                                                                                                                                                                                                                                                                                                                                                                                                                                                                                                                                                                                                                                                                                                                                                                                                                                                                                                                                                                                                                                                                                                                                                                                                                                                                                                                                                                                                                                                                                                                                 |
|-------------------------------------------------------------------------------------------------------------------------------------------------------------------------------------------------------------------------------------------------------------------------------------------------------------------------------------------------------------------------------------------------------------------------------------------------------------------------------------------------------------------------------------------------------------------------------------------------------------------------------------------------------------------------------------------------------------------------------------------------------------------------------------------------------------------------------------------------------------------------------------------------------------------------------------------------------------------------------------------------------------------------------------------------------------------------------------------------------------------------------------------------------------------------------------------------------------------------------------------------------------------------------------------------------------------------------------------------------------------------------------------------------------------------------------------------------------------------------------------------------------------------------------------------------------------------------------------------------------------------------------------------------------------------------------------------------------------------------------------------------------------------------------------------------------------------------------------------------------------------------------------------------------------------------------------------------------------------------------------------------------------------------------------------------------------------------------------------------------------------------------------------------------------------------------------------------------------------------------------------------------------------------------------------------------------------------------------------------------------------------------------------------------------------------------------------------------------------------------------------------------------------------------------------------------------------------------------------------------------------------------------------------------------------------------------------------------------------------------------------------------------------------------------------------------------------------------------------------------------------------------------------------------------------------------------------------------------------------------------------------------------------------------------------------------------------------------------------------------------------------------------------------------------------------------------------------------------------------------------------------------------------------------------------------------------------------------------------------------------------------------------------------------------------------------------------------------------------------------------------------------------------------------------------------------------------------------------------------------------------------------------------------------------------------------------------------------------------------------------------------------------------------------------------------------------------------------------------------------------------------------------------|
| <p><b>Instruction</b></p> <p>Prove the following lemma statement in Isabelle.<br/>Ensure that the proof is complete, logically sound and free of redundant content. Use appropriate tactics and lemmas as necessary. Don't explain.</p> <p><b>Input</b></p> <pre>lemma pred_restrs_cut: "(<math>\exists y. \text{restrs } x \subseteq y</math>) <math>\Rightarrow</math> (<math>\exists y. \text{pred\_restrs } nn \text{ restrs } x \subseteq y</math>)"</pre> <p><b>output</b></p> <pre>apply (clarsimp simp: pred_restrs_def split: next_node.split) apply blast done</pre>                                                                                                                                                                                                                                                                                                                                                                                                                                                                                                                                                                                                                                                                                                                                                                                                                                                                                                                                                                                                                                                                                                                                                                                                                                                                                                                                                                                                                                                                                                                                                                                                                                                                                                                                                                                                                                                                                                                                                                                                                                                                                                                                                                                                                                                                                                                                                                                                                                                                                                                                                                                                                                                                                                                                                                                                                                                                                                                                                                                                                                                                                                                                                                                                                                                                                                                  |
| <p><b>Instruction</b></p> <p>Prove the following lemma statement in Isabelle.<br/>Ensure that the proof is complete, logically sound and free of redundant content. Use appropriate tactics and lemmas as necessary. Don't explain.</p> <p><b>Input</b></p> <pre>lemma if_x_None_eq_Some: "((if P then x else None) = Some y) = (P <math>\wedge</math> x = Some y)"</pre> <p><b>Output</b></p> <pre>by simp</pre>                                                                                                                                                                                                                                                                                                                                                                                                                                                                                                                                                                                                                                                                                                                                                                                                                                                                                                                                                                                                                                                                                                                                                                                                                                                                                                                                                                                                                                                                                                                                                                                                                                                                                                                                                                                                                                                                                                                                                                                                                                                                                                                                                                                                                                                                                                                                                                                                                                                                                                                                                                                                                                                                                                                                                                                                                                                                                                                                                                                                                                                                                                                                                                                                                                                                                                                                                                                                                                                                               |
| <p><b>Instruction</b></p> <p>Prove the following lemma statement in Isabelle.<br/>Ensure that the proof is complete, logically sound and free of redundant content. Use appropriate tactics and lemmas as necessary. Don't explain.</p> <p><b>Input</b></p> <pre>lemma visit_merge: assumes tr: "tr <math>\in</math> exec_trace Gamma fn" "Gamma fn = Some f" and wf: "wf_graph_function f ilen olen" and ns: "nn <math>\neq</math> NextNode (entry_point f)" "<math>\forall n \in</math> set ns. graph n = Some (Basic nn [])" "converse (reachable_step graph) "<math>\{nn\} \subseteq</math> NextNode ' set ns" and geq: "function_graph f = graph" and cut: "<math>\forall x. \text{NextNode } x \in</math> set cuts <math>\rightarrow</math> (<math>\exists y. \text{restrs } x \subseteq \{y\}</math>)" "<math>\forall n \in</math> set ns. (nn, NextNode n) <i>notin</i> rtrancl (reachable_step graph <math>\cap</math> <math>\{(x, y). x \text{ notin set cuts}\}</math>)" shows "visit tr nn restrs = fold merge_opt (map (<math>\lambda n. \text{visit tr (NextNode n)</math> (pred_restrs' n restrs)) ns) None"</pre> <p><b>Output</b></p> <pre>proof - note ns = ns[folded geq] note cut = cut[folded geq] have step_after: "<math>\wedge n i. n \in</math> set ns <math>\Rightarrow</math> trace_bottom_addr tr i = Some (NextNode n) <math>\Rightarrow</math> <math>\exists st. \text{tr } i =</math> Some [(NextNode n, st, fn)] <math>\wedge \text{tr (Suc } i) =</math> Some [(nn, st, fn)] <math>\wedge \text{trace\_addr tr (Suc } i) =</math> Some nn <math>\wedge \text{restrs\_condition tr restrs (Suc } i)</math> = restrs_condition tr (pred_restrs' n restrs) i" apply (drule exec_trace_non_Call[OF tr], (simp add: ns)+) apply (frule ns[rule_format], cut_tac tr(2)) apply (frule trace_addr_SomeD, clarsimp) apply (frule exec_trace_invariant[OF tr(1)]) apply (cut_tac i=i in exec_trace_step_cases[OF tr(1)]) apply (clarsimp simp: all_exec_graph_step_cases exec_graph_invariant_Cons upd_vars_def save_vals_def) apply (simp add: pred_restrs[OF tr(1)] trace_addr_SomeI trace_bottom_addr_def K_def) done have step_after_single: "<math>\wedge n i. n \in</math> set ns <math>\Rightarrow</math> trace_bottom_addr tr i = Some (NextNode n) <math>\Rightarrow</math> restrs_condition tr restrs (Suc i) <math>\Rightarrow</math> (<math>\forall n' j. n' \in</math> set ns <math>\rightarrow</math> trace_addr tr j = Some (NextNode n')) <math>\rightarrow</math> restrs_condition tr (pred_restrs' n' restrs) j <math>\rightarrow</math> j = i" apply clarsimp apply (frule step_after, erule trace_addr_trace_bottom_addr_eq) apply (frule(1) step_after) apply clarsimp apply (drule(2) restrs_single_visit[OF tr wf _ _ _ cut(1)], simp_all) apply (rule not_trancl_converse_step, rule ns) apply (simp add: cut) done have visit_after: "<math>\wedge n v. n \in</math> set ns <math>\Rightarrow</math> visit tr (NextNode n) (pred_restrs' n restrs) = Some v <math>\Rightarrow</math> visit tr nn restrs <math>\neq</math> None" apply (clarsimp simp: visit_eqs) apply (drule_tac i=i in step_after, simp add: trace_addr_trace_bottom_addr_eq) apply (rule_tac x="Suc i" in exI) apply clarsimp done show ?thesis apply (rule sym, cases "visit tr nn restrs", simp_all) apply (rule fold_merge_opt_Nones_eq) apply (rule ccontr, clarsimp simp: visit_after) apply (clarsimp simp: visit_eqs) apply (frule visit_immediate_pred[OF tr wf _ ns(1, 3)]) apply clarsimp apply (frule(1) step_after, clarsimp) apply (frule(2) step_after_single) apply (drule in_set_conv_decomp_last[THEN iffD1]) apply clarsimp apply (rule trans, rule fold_merge_opt_Nones_eq) apply (rule ccontr, clarsimp simp: visit_eqs pc_def ball_Un) apply (simp add: trace_addr_SomeI) apply (subst visit_known, assumption, simp_all) apply clarsimp done qed</pre> |

318 We use a cosine learning rate scheduler with the maximum  $lr = 1e - 4$ , minimal  $lr = 1e - 5$ ,  
319  $warmup\_ratio = 0.1$ . Fine-tuning lasts up to 10 epochs with an early-stop mechanism at minimal  
320 evaluation loss. For Mistral-7B and Llama-3-8B, the fine-tuning lasts about 30 GPU hours.



Table 2: Inference template for prompting FVEL-LLMs.

|                                                                                                                                                                                                                   |
|-------------------------------------------------------------------------------------------------------------------------------------------------------------------------------------------------------------------|
| Prove the following lemma statement in Isabelle. Ensure that the proof is complete, logically sound and free of redundant content. Use appropriate tactics and lemmas as necessary. Don't explain.<br>{statement} |
|-------------------------------------------------------------------------------------------------------------------------------------------------------------------------------------------------------------------|

Table 3: Automated theorem proving result on FVELER.

|                 | FVELER test (#=1077) | FVELER test-hard (#=852) |
|-----------------|----------------------|--------------------------|
| Mistral-7B      | 26                   | 19                       |
| FVEL-Mistral-7B | 74                   | 49                       |
| Llama-3-8B      | 39                   | 27                       |
| FVEL-Llama-3-8B | 88                   | 64                       |

Table 4: Compared generated proofs by Mistral-7B and FVEL-Mistral-7B.

| Input                                                                            | Mistral-7B                                                                                                                                                                                                                                                                                         | FVEL-Mistral-7B                                                                                                                                                                                                                     |
|----------------------------------------------------------------------------------|----------------------------------------------------------------------------------------------------------------------------------------------------------------------------------------------------------------------------------------------------------------------------------------------------|-------------------------------------------------------------------------------------------------------------------------------------------------------------------------------------------------------------------------------------|
| lemma not_minus:<br>"NOT (x - y) = y - x - 1"                                    | assume "NOT (x - y) = y - x - 1"<br>hence "x - y = y - x - 1" by simp<br>hence "x = y - 1" by simp<br>thus "x = y" by contradiction<br>qed                                                                                                                                                         | by (simp add: not_eq_complement)                                                                                                                                                                                                    |
| lemma and_and_not [simp]:<br>"(a AND b) AND NOT b = 0" for a b :: "'a::len word" | lemma and_and_not[simp]:<br>assumes "a: 'a::len word" and "b: 'a::len word"<br>shows "(a AND b) AND NOT b = 0"<br>proof -<br>from assms have "a AND b = (a AND b) AND (a OR b)" by simp<br>then have "a AND (b AND NOT b) = (a AND b) AND (a OR b)" by simp<br>finally show ?thesis by simp<br>qed | proof -<br>have "(a AND b) AND NOT b = a AND (b AND NOT b)"<br>by (simp add: word_bw_assoc)<br>also have "... = a AND 0"<br>by (simp add: word_and_not)<br>also have "... = 0"<br>by simp<br>finally show ?thesis<br>by simp<br>qed |

321 **Inference.** During inference, the model generates the complete proof in a single pass using a  
 322 zero-shot approach, and PISA verifies the resulting proof. We manually add the imports and include  
 323 theorems needed for the proof to the environment so that they are correctly referenced. We set the  
 324 temperature to 0.0 during inference to assess the model's greedy performance. The inference template  
 325 to prompt the model is demonstrated in Table 2.

## 326 D.2 Results

327 Table 3 illustrates the result of fine-tuning Mistral and Llama3 on our FVELER training set and testing  
 328 on the FVELER test set and test-hard set. The fine-tuned Llama-3-8B and mistral-7B effectively  
 329 improve the correctness of the proofs, with FVEL-Mistral-7B and FVEL-Llama-3-8B each achieving a  
 330 4.5% improvement (2.4% -> 6.9% and 3.6% -> 8.1%, respectively) on the FVELER test split.  
 331 On the more complex FVELER test-hard split, 3.5% (2.3% -> 5.8%) and 4.3% (3.2% -> 7.5%)  
 332 improvement are achieved respectively. Currently, the pass rate for both Mistral and Llama remains  
 333 relatively low, indicating that the proposed benchmark poses significant challenges for LLMs. The  
 334 poor results are primarily caused by these two factors: 1) **Data scarcity.** The amount of data available  
 335 on formal verification is relatively small compared to the data required to train a general LLM. This  
 336 is a long-standing challenge in the domain of formal mathematics and formal verification. FVELER  
 337 remedies the issue by incorporating data from formal verification, but we still require much more data  
 338 for the LLM to perform better on the subject. 2) **Tactic application style.** The majority of proofs  
 339 are written in a tactic application style. Compared to the declarative style, these codes cannot be  
 340 understood even by humans without interacting with Isabelle and checking the proof state information  
 341 given by the formal system. The current whole proof paradigm requires generating the proof in one  
 342 go without the help of the proof state information, which poses a significant challenge.

Table 5: Comparison of Original and Processed C Code

| Original Code                                                                                                                                                                                                                                                                                                                                                                                                                                                                                                                                                                                                                                                                                                                                                                                                                                                                                         | Processed Code                                                                                                                                                                                                                                                                                                                                                                                                                                                                                                                                                                                               |
|-------------------------------------------------------------------------------------------------------------------------------------------------------------------------------------------------------------------------------------------------------------------------------------------------------------------------------------------------------------------------------------------------------------------------------------------------------------------------------------------------------------------------------------------------------------------------------------------------------------------------------------------------------------------------------------------------------------------------------------------------------------------------------------------------------------------------------------------------------------------------------------------------------|--------------------------------------------------------------------------------------------------------------------------------------------------------------------------------------------------------------------------------------------------------------------------------------------------------------------------------------------------------------------------------------------------------------------------------------------------------------------------------------------------------------------------------------------------------------------------------------------------------------|
| <pre> extern void abort(void); extern void __assert_fail(const char *,     const char *, unsigned int, const     char *) __attribute__((__nothrow__ ,     __leaf__)) __attribute__((     __noreturn__)); void reach_error() { __assert_fail("0", "     nested3-2.c", 3, "reach_error"); }  void __VERIFIER_assert(int cond) {     if (!(cond)) {         ERROR: { reach_error(); abort(); }     }     return; }  int main() {     unsigned int x = 0;     unsigned int y = 0;     unsigned int z = 0;     unsigned int w = 0;      while (x &lt; 0x0fffffff) {         y = 0;          while (y &lt; 0x0fffffff) {             z = 0;             while (z &lt; 0x0fffffff) {                 z++;             }             __VERIFIER_assert(!(z % 4));             y++;         }         __VERIFIER_assert(!(y % 2));          x++;     }     __VERIFIER_assert(!(x % 2));     return 0; } </pre> | <pre> extern void abort(void);  void VERIFIER_assert(int cond) {     if (!(cond)) {         { abort(); }     }     return; }  int main() {     unsigned int x = 0;     unsigned int y = 0;     unsigned int z = 0;     unsigned int w = 0;      while (x &lt; 0x0fffffff) {         y = 0;          while (y &lt; 0x0fffffff) {             z = 0;             while (z &lt; 0x0fffffff) {                 z++;             }             VERIFIER_assert(!(z % 4));             y++;         }         VERIFIER_assert(!(y % 2));          x++;     }     VERIFIER_assert(!(x % 2));     return 0; } </pre> |

### 343 D.3 Case Study

344 Table 4 demonstrates compared generated proofs by Mistral-7B and FVEL-Mistral-7B after being  
345 fine-tuned with FVELER. The upper row shows a case in which FVEL-Mistral-7B correctly applies  
346 the lemma learned from fine-tuning, thus correcting and simplifying the proof. Contrastively,  
347 Mistral-7B generates common `not_eq_complement` without considering a reasonable proof strategy,  
348 resulting in a failed proof. In the second case, Mistral-7B rewrites the lemma statement into “assumes”  
349 and “shows” statements, according to which gives an incorrect proof. FVEL-Mistral-7B, on the other  
350 hand, expands the brackets in the equation and then is able to derive contradiction according to “(b  
351 AND NOT b)”, and completes the proof via the contradiction of the right-hand side of the equation.

## 352 E Implementations Details on Code2Inv and SV-COMP

353 This section provides supplementary details regarding the benchmark study in Section 5.

### 354 E.1 Evaluation Datasets

355 **Code2Inv [7].** The code2inv dataset contains 133 programs in c, each containing a pre-condition,  
356 a loop body (while or for statement), and a post-condition. The verifier needs to verify that the  
357 post-condition (an assertion) holds. It is worth pointing out that the condition of a loop or branch in  
358 the program may be indeterminate.

Table 6: A Python to C data sample.

| Python Code                                                                                                                                                                                                    | C Code                                                                                                                                                                                                                                                                                      |
|----------------------------------------------------------------------------------------------------------------------------------------------------------------------------------------------------------------|---------------------------------------------------------------------------------------------------------------------------------------------------------------------------------------------------------------------------------------------------------------------------------------------|
| <pre> def removeDuplicates(nums: List[int]) -&gt;     int:     j = 1     for i in range(1, len(nums)):         if nums[i] != nums[i - 1]:             nums[j] = nums[i]             j += 1     return j </pre> | <pre> int removeDuplicates(int* nums) {     int numsSize = sizeof(nums) / sizeof(         nums[0]);     int j = 1;     for (int i = 1; i &lt; numsSize; i++) {         if (nums[i] != nums[i - 1]) {             nums[j] = nums[i];             j++;         }     }     return j; } </pre> |

359 **SV-COMP [1].** The Software-Verification Competition provides a diverse set of benchmarks for formal verification. sv-comp benchmark contains over 23k c programs, which tend to be more complex than those in code2inv, and each program is accompanied by a .yml file to declare its specifications. These specifications cover requirements such as ReachSafety, MemSafety, ConcurrencySafety, NoOverflows, Termination, etc. The verifier is required to determine whether a program satisfies the given specifications. We sampled the SV-COMP benchmark into two subsets: a 47-sample subset sampled by Lemur [8], which contains samples with multiple nested loops, and a 1,000-sample subset which is randomly sampled from the full set. In particular, we exclude samples that contain floating-point type because the C-parser cannot parse them correctly.

## 368 E.2 Pre-processing

369 Table 5 demonstrates a randomly selected sample before pre-processing (original code) and after pre-processing (processed code). The pre-processing stages are explained as follows.

371 **Data Preprocess.** Since C-parser supports only part of the C99 standard, some C features (e.g. “goto” statements, side effects in expressions, etc.) are not supported, we normalize the C code to make C-parser work properly. Specially, for C code which includes:

374 **String Literal and Illegal Function Name.** Functions with string literals are often used to give warnings to the verifier, we remove these functions and keep only “extern void abort(void);” In addition, we fix illegal function names, for example, by removing the underlines at the beginning of the name.

378 **Assertion and Assumption.** We replace all the “assert(statement);” and “assume(statement);” with “if (not (statement)) {return -1;}”. Note that all assertions appear in the “main()” function, so the semantics before and after the replacement are equivalent.

382 **Unknown Condition.** “unknown()” is often used in the Code2Inv dataset as a condition in “while” or “if” expressions, and we add external declarations to this function: “extern int unknown(void);”.

## 385 E.3 Fine-tuning and Inference

386 See Appendix D.1 for fine-tuning and inference details.

## 387 E.4 A Case of Python to C Dataset.

388 See Table 6.

## 389 References

390 [1] Dirk Beyer. Competition on software verification and witness validation: SV-COMP 2023.  
391 In Sriram Sankaranarayanan and Natasha Sharygina, editors, *Tools and Algorithms for the*

- 392 *Construction and Analysis of Systems - 29th International Conference, TACAS 2023, Held as*  
393 *Part of the European Joint Conferences on Theory and Practice of Software, ETAPS 2022, Paris,*  
394 *France, April 22-27, 2023, Proceedings, Part II*, volume 13994 of *Lecture Notes in Computer*  
395 *Science*, pages 495–522. Springer, 2023.
- 396 [2] Mikhail Y. R. Gadelha, Felipe R. Monteiro, Jeremy Morse, Lucas C. Cordeiro, Bernd Fischer,  
397 and Denis A. Nicole. ESBMC 5.0: an industrial-strength C model checker. In Marianne Huchard,  
398 Christian Kästner, and Gordon Fraser, editors, *Proceedings of the 33rd ACM/IEEE International*  
399 *Conference on Automated Software Engineering, ASE 2018, Montpellier, France, September 3-7,*  
400 *2018*, pages 888–891. ACM, 2018.
- 401 [3] Timnit Gebru, Jamie Morgenstern, Briana Vecchione, Jennifer Wortman Vaughan, Hanna M.  
402 Wallach, Hal Daumé III, and Kate Crawford. Datasheets for datasets. *Commun. ACM*, 64(12):86–  
403 92, 2021.
- 404 [4] Matthias Heizmann, Jürgen Christ, Daniel Dietsch, Evren Ermis, Jochen Hoenicke, Markus  
405 Lindenmann, Alexander Nutz, Christian Schilling, and Andreas Podelski. Ultimate automizer  
406 with smtinterpol - (competition contribution). In Nir Piterman and Scott A. Smolka, editors, *Tools*  
407 *and Algorithms for the Construction and Analysis of Systems - 19th International Conference,*  
408 *TACAS 2013, Held as Part of the European Joint Conferences on Theory and Practice of Software,*  
409 *ETAPS 2013, Rome, Italy, March 16-24, 2013. Proceedings*, volume 7795 of *Lecture Notes in*  
410 *Computer Science*, pages 641–643. Springer, 2013.
- 411 [5] Edward J Hu, Yelong Shen, Phillip Wallis, Zeyuan Allen-Zhu, Yuanzhi Li, Shean Wang, Lu Wang,  
412 and Weizhu Chen. Lora: Low-rank adaptation of large language models. *arXiv preprint*  
413 *arXiv:2106.09685*, 2021.
- 414 [6] Albert Q. Jiang, Alexandre Sablayrolles, Arthur Mensch, Chris Bamford, Devendra Singh Chap-  
415 lot, Diego de Las Casas, Florian Bressand, Gianna Lengyel, Guillaume Lample, Lucile Saulnier,  
416 L  lio Renard Lavaud, Marie-Anne Lachaux, Pierre Stock, Teven Le Scao, Thibaut Lavril, Thomas  
417 Wang, Timoth  e Lacroix, and William El Sayed. Mistral 7b. *CoRR*, abs/2310.06825, 2023.
- 418 [7] Xujie Si, Aaditya Naik, Hanjun Dai, Mayur Naik, and Le Song. Code2inv: A deep learning  
419 framework for program verification. In Shuvendu K. Lahiri and Chao Wang, editors, *Computer*  
420 *Aided Verification - 32nd International Conference, CAV 2020, Los Angeles, CA, USA, July 21-24,*  
421 *2020, Proceedings, Part II*, volume 12225 of *Lecture Notes in Computer Science*, pages 151–164.  
422 Springer, 2020.
- 423 [8] Haoze Wu, Clark Barrett, and Nina Narodytska. Lemur: Integrating large language models in  
424 automated program verification. In *The Twelfth International Conference on Learning Representations*,  
425 2024.
- 426 [9] Yaowei Zheng, Richong Zhang, Junhao Zhang, Yanhan Ye, Zheyuan Luo, and Yongqiang  
427 Ma. Llamafactory: Unified efficient fine-tuning of 100+ language models. *arXiv preprint*  
428 *arXiv:2403.13372*, 2024.
